# Supplementary figures and images for: NMR-metabolomics profiling of mammary gland secretory tissue and milk serum in two goat breeds with different levels of tolerance to seasonal weight loss
Source: Royal Society of Chemistry journal article supplement (doi:10.1039/c5mb00851d), 2016-03-09

**A**

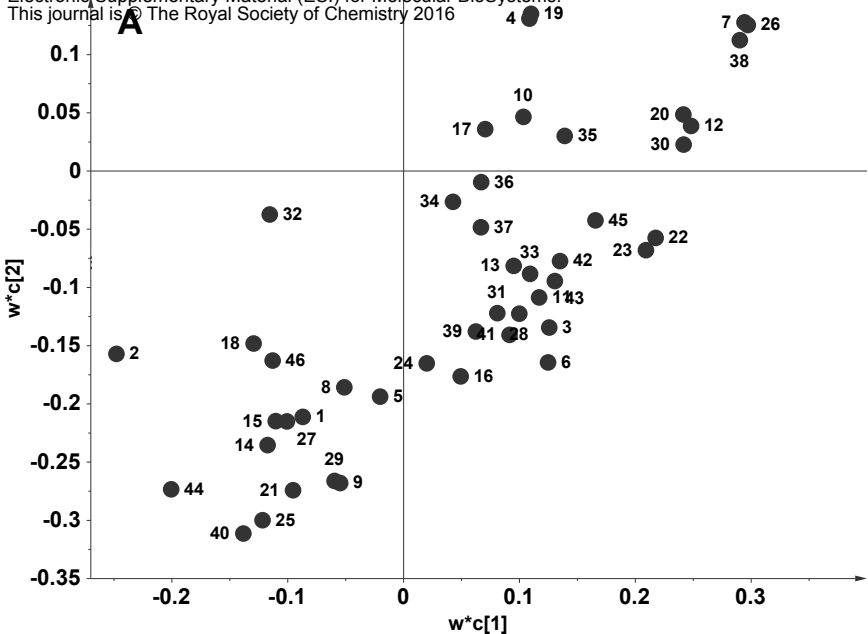

**B**

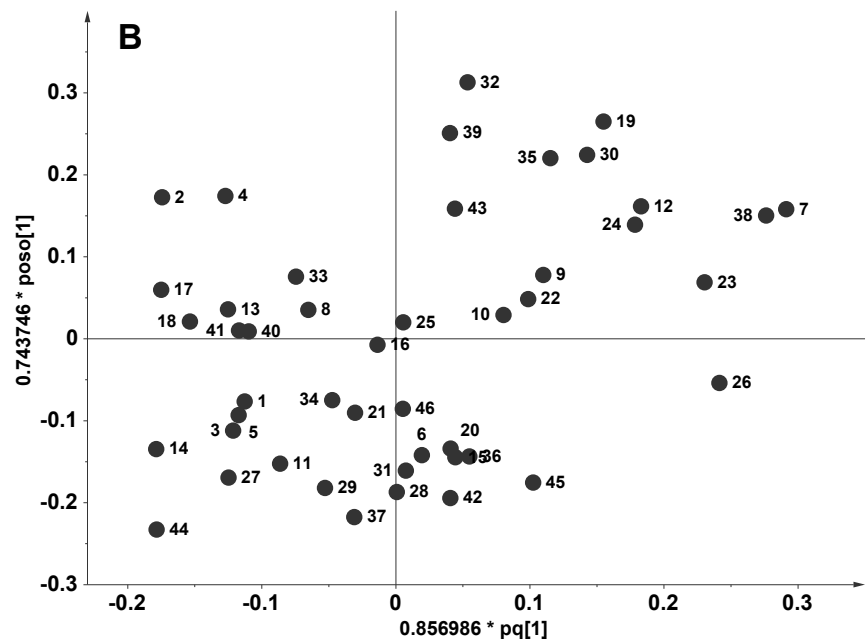

Supplement: c5mb00851d1.pdf [file c5mb00851d1.pdf]

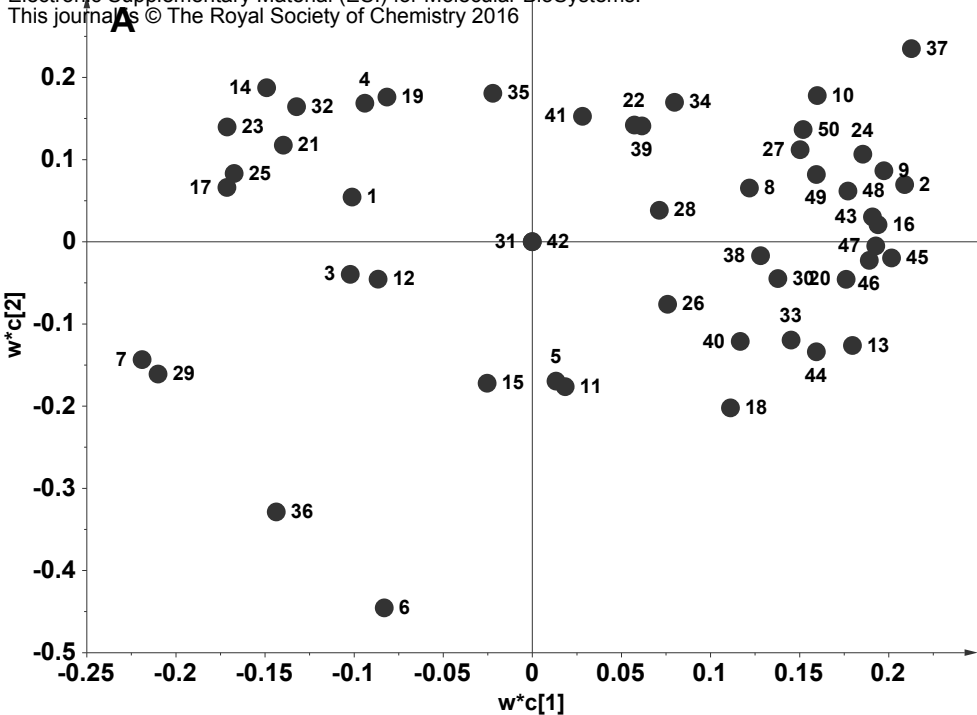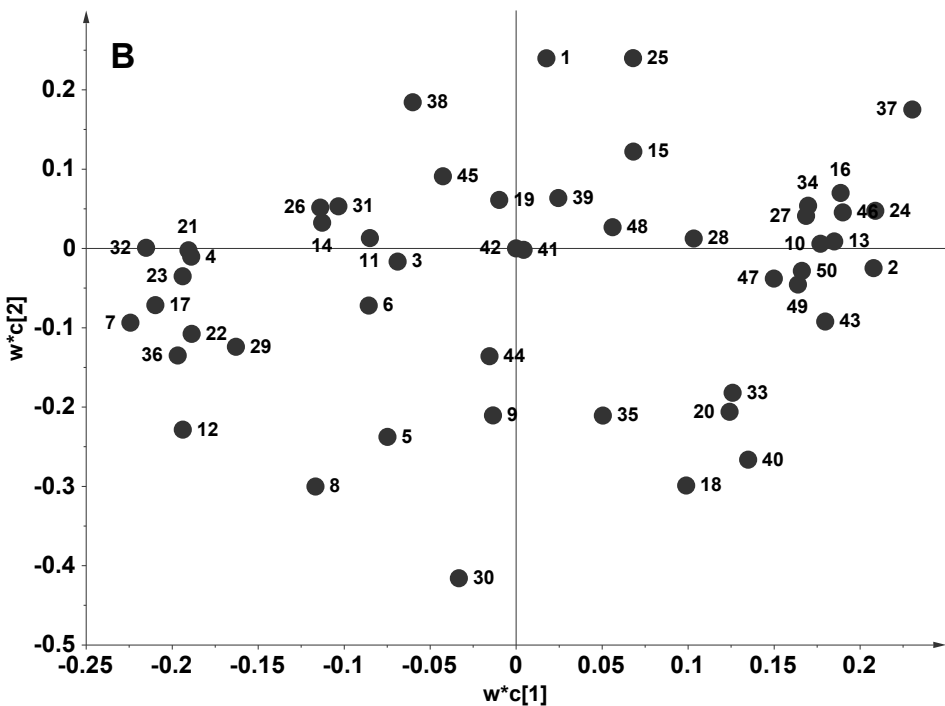

Supplement: c5mb00851d2.pdf [file c5mb00851d2.pdf]
